# Supplementary material for: Pyroptosis-Related Gene Signatures Can Robustly Diagnose Skin Cutaneous Melanoma and Predict the Prognosis
Source: Front Oncol. 2021 Jul 13;11:709077. doi: 10.3389/fonc.2021.709077 (PMC8313829; doi:10.3389/fonc.2021.709077)
Supplement: Supplementary Table 2 — Major parameters. [file Table_2.xlsx]

## Sheet: Sheet1
Classifiers	Parameters (Parameters not listed are default)
KNN	n_neighbors=4
logistic regression	C=1, penalty='l2', tol=0.01
SVM	C=5, gamma="auto", kernel='rbf'
ANN	max_iter=1000, alpha=1
decision tree	max_depth=1
random forest	n_estimators=10000
XGBoost	default
LightGBM	default
CatBoost	default
